# Supplementary material
Source: Springer Nature journal article supplement (https://www.springermedizin.de/resource/supplementary/12913_2008_838_MOESM2_ESM.pdf/9535694)
Supplement: MOESM2 [file 9535694]

| Cluster                    | Components of value assessment (alphabetical by cluster)          | Definition                                                                                                                                                                                                                                                                                                                                                                               | Scoring scale                                                              |                                              |
|----------------------------|-------------------------------------------------------------------|------------------------------------------------------------------------------------------------------------------------------------------------------------------------------------------------------------------------------------------------------------------------------------------------------------------------------------------------------------------------------------------|----------------------------------------------------------------------------|----------------------------------------------|
|                            |                                                                   |                                                                                                                                                                                                                                                                                                                                                                                          | Low value                                                                  | High value                                   |
| <b>Quality of evidence</b> |                                                                   |                                                                                                                                                                                                                                                                                                                                                                                          |                                                                            |                                              |
| Q1                         | Adherence to requirements of decisionmaking body                  | Extent to which evidence on the proposed intervention submitted to a decisionmaking body fulfills requirements of that body with respect to the type of evidence to be provided, level of detail to be presented, sources to be supplied/indicated etc.                                                                                                                                  | Low adherence                                                              | High adherence                               |
| Q2                         | Completeness and consistency of reporting evidence                | Extent to which reporting of evidence on the proposed intervention is complete (i.e., meeting international standards on reporting) and consistent with the sources cited                                                                                                                                                                                                                | Many gaps / inconsistent                                                   | Complete and consistent                      |
| Q3                         | Relevance and validity of evidence                                | Extent to which evidence on the proposed intervention is relevant to the decisionmaking body (in terms of population, disease stage, comparator interventions, outcomes etc.) and valid with respect to international standards (i.e., study design etc.) and conclusions (agreement of results between studies)                                                                         | Low relevance / validity                                                   | High relevance / validity                    |
| <b>Disease impact</b>      |                                                                   |                                                                                                                                                                                                                                                                                                                                                                                          |                                                                            |                                              |
| D1                         | Disease severity                                                  | Severity of the health condition targeted by the proposed intervention with respect to mortality, disability, impact on quality of life, clinical course (i.e., acuteness, clinical stages)                                                                                                                                                                                              | Not severe (minor inconvenience)                                           | Very severe                                  |
| D2                         | Size of population affected by disease                            | Number of people affected by the condition (targeted by the proposed intervention) among a specified population at a specified time; can be expressed as annual number of new cases (annual incidence) and/or proportion of the population affected at a certain point of time (prevalence)                                                                                              | Very rare disease                                                          | Common disease                               |
| <b>Intervention</b>        |                                                                   |                                                                                                                                                                                                                                                                                                                                                                                          |                                                                            |                                              |
| I1                         | Current clinical guidelines                                       | Concurrence of the proposed intervention (or similar alternatives) with the current consensus of a group of experts on what constitutes state-of-the-art practices in the management of the targeted health condition; guidelines are usually developed via an explicit process and are intended to improve clinical practice                                                            | No recommendation                                                          | Strong recommendation                        |
| I2                         | Current interventions' limitations                                | Shortcomings of current interventions in their ability to prevent, cure, or ameliorate the condition targeted by the proposed intervention; also includes shortcomings with respect to safety, convenience or patient acceptance                                                                                                                                                         | No or very minor limitations                                               | Major limitations                            |
| I3                         | Improvement of efficacy/effectiveness                             | Capacity of the proposed intervention to produce a desired (beneficial) change in signs, symptoms or course of the targeted condition above and beyond beneficial changes produced by alternative interventions. Includes efficacy and effectiveness data, as available                                                                                                                  | Lower efficacy/ effectiveness than comparators presented                   | Major improvement in efficacy/ effectiveness |
| I4                         | Improvement of safety & tolerability                              | Reduction in intervention-related health effects that are harmful or undesired compared to alternative interventions                                                                                                                                                                                                                                                                     | Lower safety/ tolerability than comparators presented                      | Major improvement in safety/ tolerability    |
| I5                         | Improvement of patient reported outcomes, convenience & adherence | Capacity of the proposed intervention to produce beneficial changes in patient-reported outcomes (PROs) (e.g., quality of life) above and beyond beneficial changes produced by alternative interventions; also includes improvement in convenience to patients and adherence to treatment course                                                                                        | Worse PROs / lower convenience/ lower adherence than comparators presented | Major improvement                            |
| I6                         | Public health interest                                            | Nature of the health benefit provided by the proposed intervention at the population-level (e.g., impact on prevention, reduction in disease transmission, reduction in the prevalence of risk factors, etc.)                                                                                                                                                                            | No risk reduction                                                          | Major risk reduction                         |
| I7                         | Type of medical service                                           | Nature of the clinical benefit provided by the proposed intervention at the patient-level (e.g., symptom relief, prolonging life, cure, diagnostic, prevention etc.)                                                                                                                                                                                                                     | Minor service                                                              | Major service                                |
| <b>Economics</b>           |                                                                   |                                                                                                                                                                                                                                                                                                                                                                                          |                                                                            |                                              |
| E1                         | Budget impact on health plan                                      | Net impact of covering the intervention on the budget of the target health plan (excluding other spending, see E3). This represents the differential between expected expenditure for the proposed intervention and cost savings that may result from replacement of other intervention(s) currently covered by the health plan. Limited to cost of intervention (e.g. acquisition cost) | Substantial additional expenditures                                        | Substantial savings for health plan          |
| E2                         | Cost-effectiveness of intervention                                | Ratio of the incremental cost of the proposed intervention to its incremental benefit. Benefit can be expressed as number of events avoided, life-years gained, quality-adjusted life-years gained, additional pain-free days etc.                                                                                                                                                       | Not cost-effective                                                         | Highly cost-effective                        |
| E3                         | Impact on other spending                                          | Impact of providing coverage for the proposed intervention on other expenditures (excluding intervention cost, see E1) such as hospitalization, specialist consultations, adverse events, long-term care, disability costs, lost productivity, caregiver time, equipment maintenance cost etc.                                                                                           | Substantial additional other spending                                      | Substantial savings                          |
